# Supplementary material for: Dried, closed-path eddy covariance method for measuring carbon dioxide flux over sea ice
Source: Copernicus journal article supplement (doi:10.5194/amt-2018-158), 2018-07-31
Supplement: Supplementary file 1 [file amt-2018-158-supplement.zip]

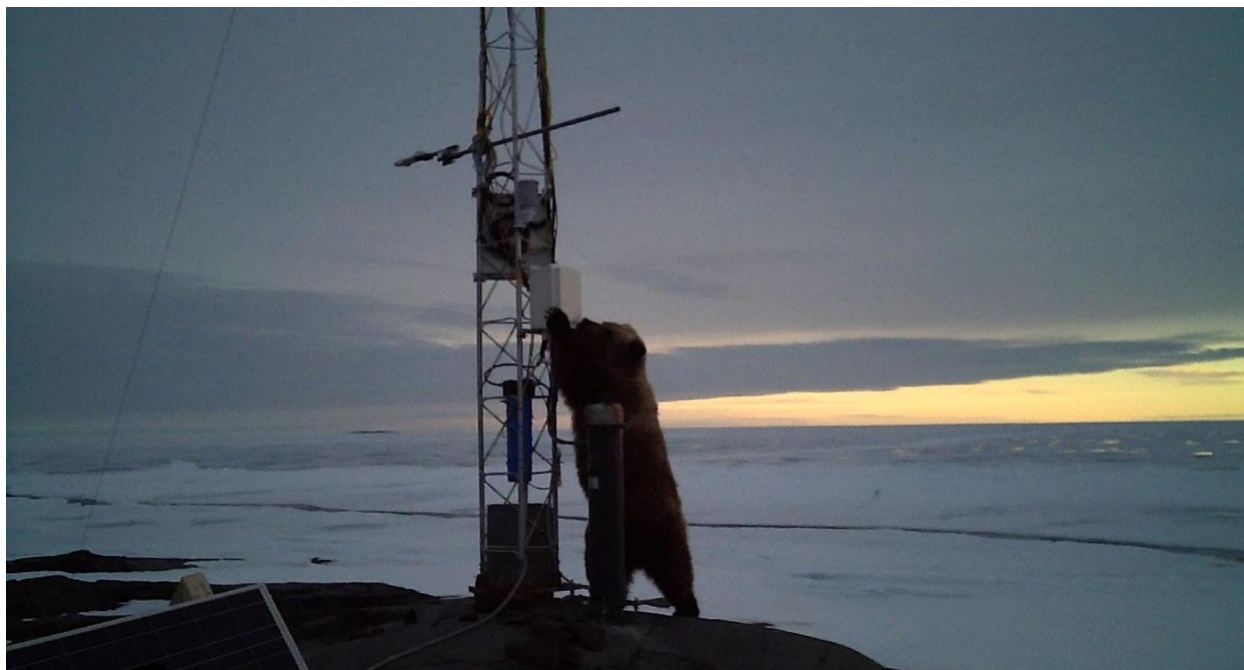

Figure S1. Picture of grizzly bear inspecting flux system. Image captured by motion sensor-activated trail camera.

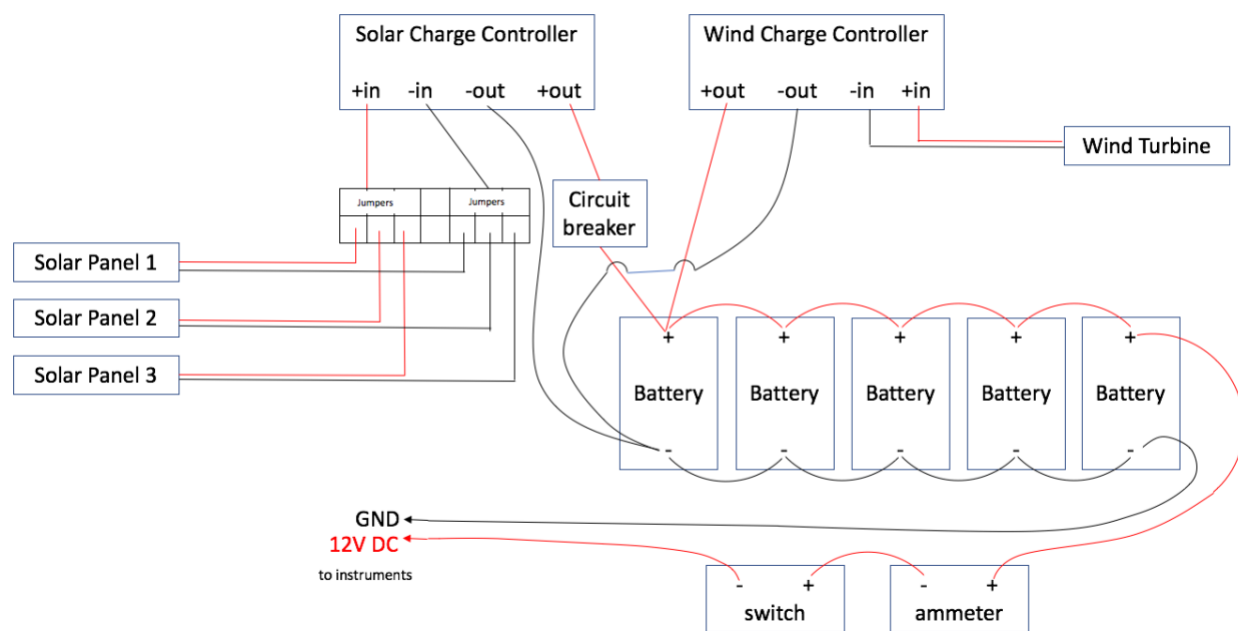

Figure S2. Schematic diagram of the power system installed at the site.

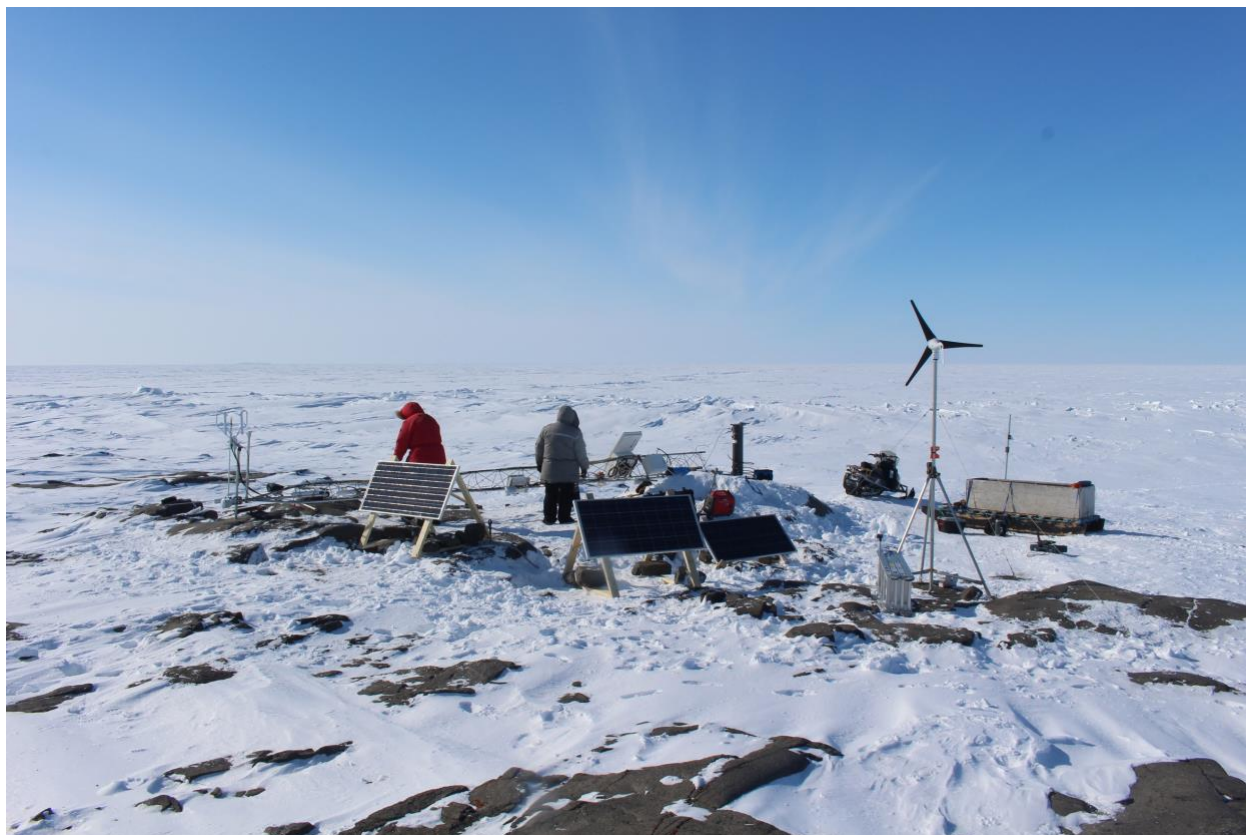

**Figure S3. Working on flux tower on April 26, 2017.**

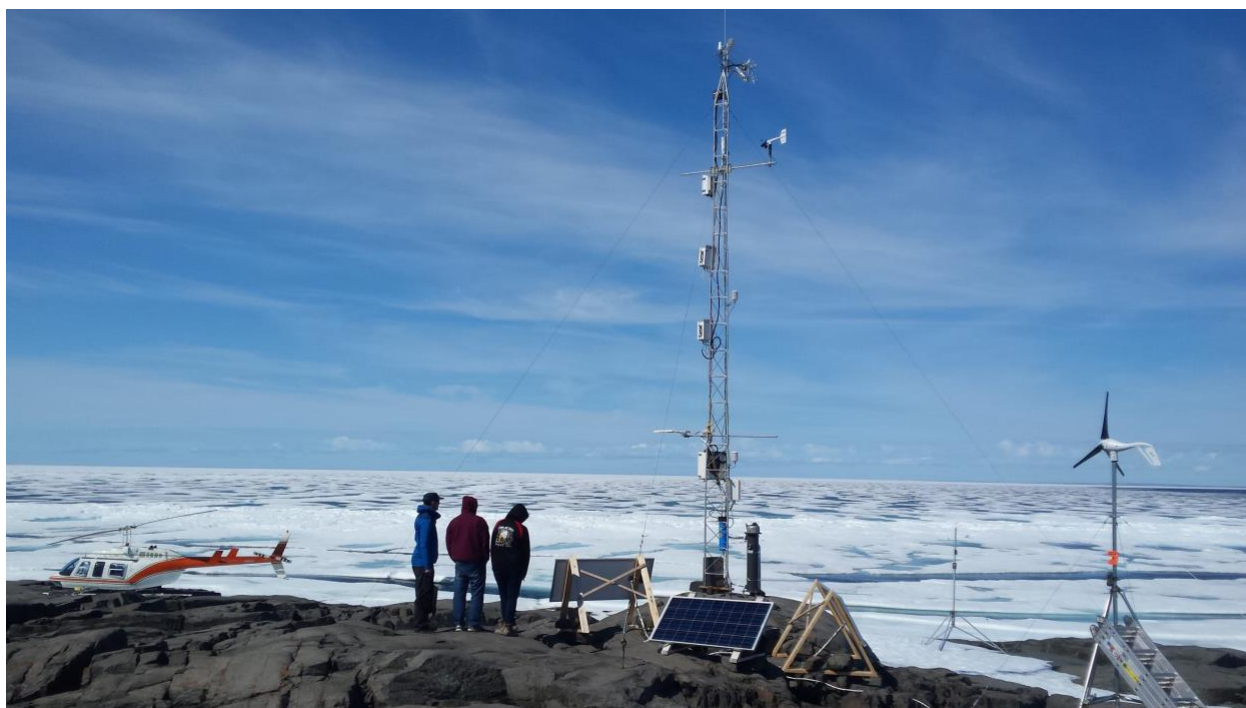

**Figure S4. Flux tower during melt pond season (June 23, 2017).**

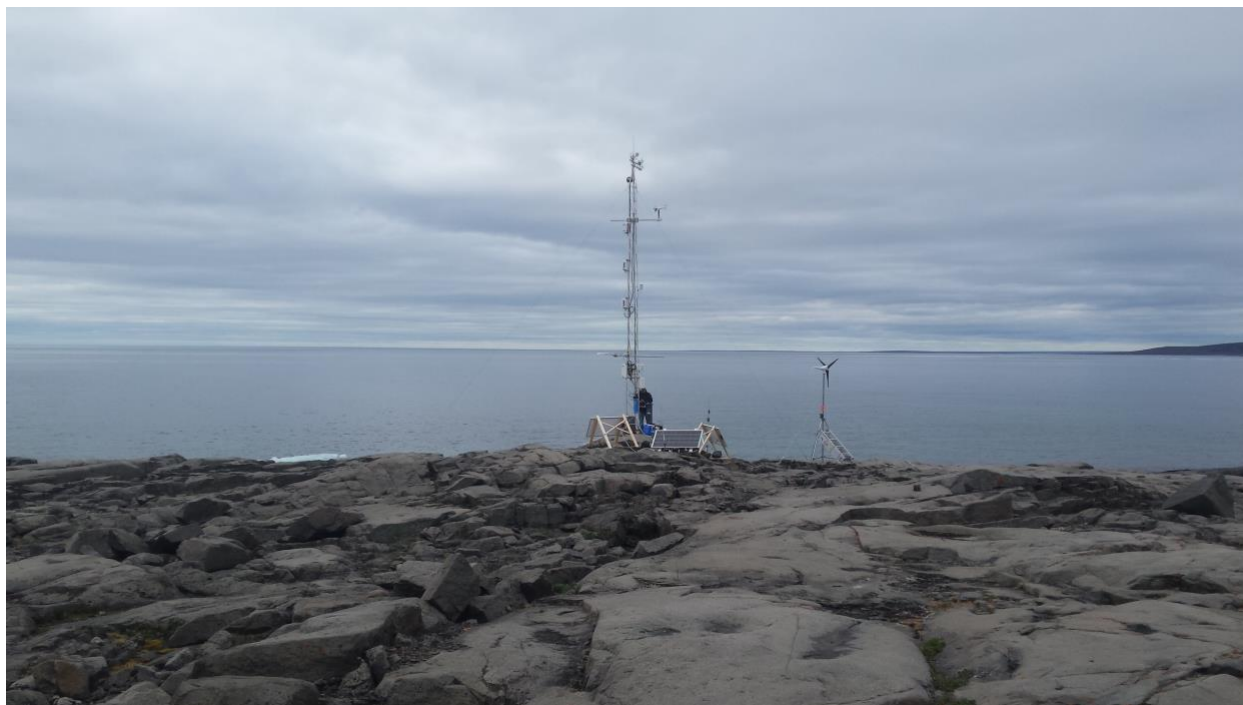

**Figure S5. Flux tower just after melt pond season (July 7, 2017).**

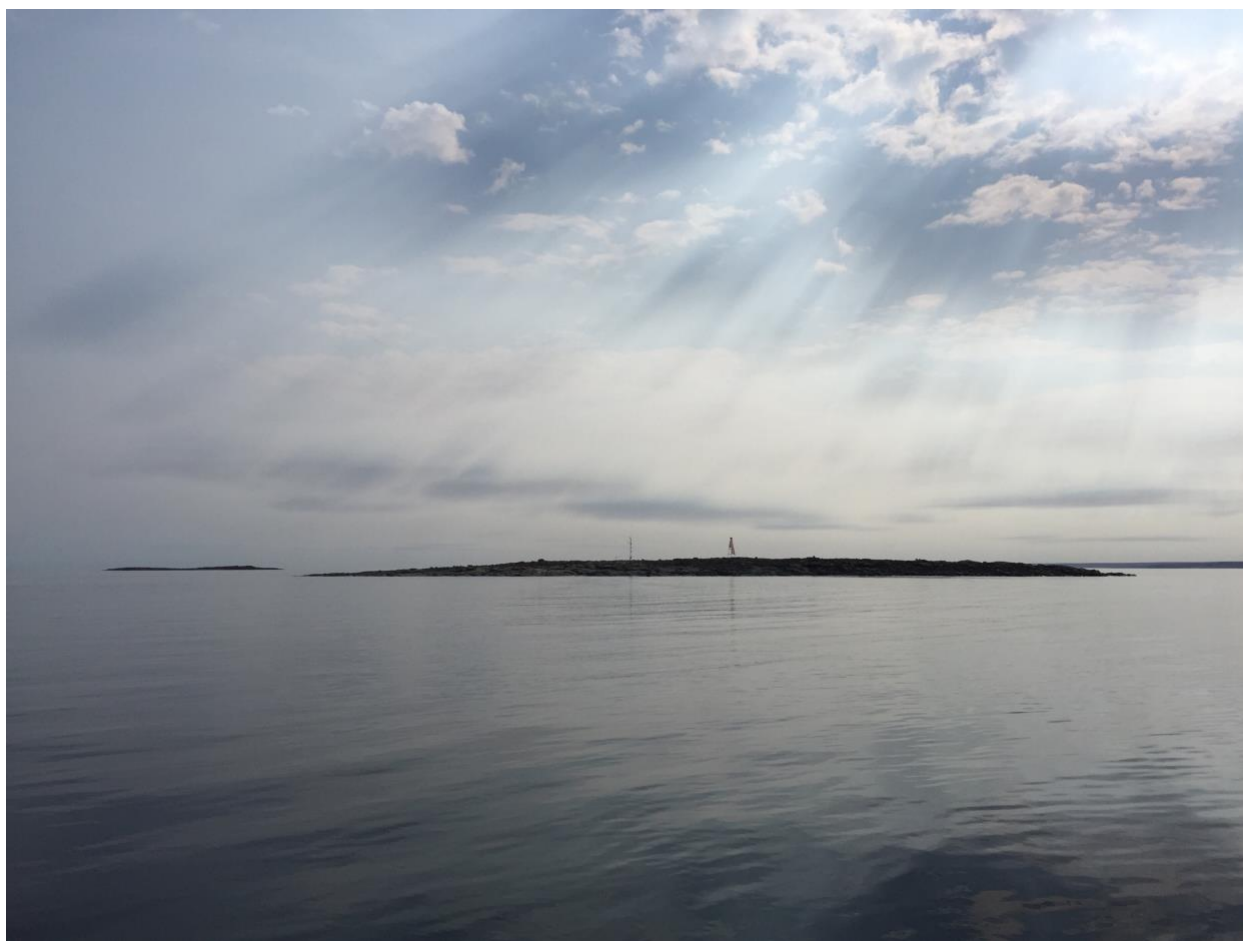

**Figure S5. Photograph of Qikirtaarjuk Island taken from the RV *Bergmann* on August 3, 2017.**



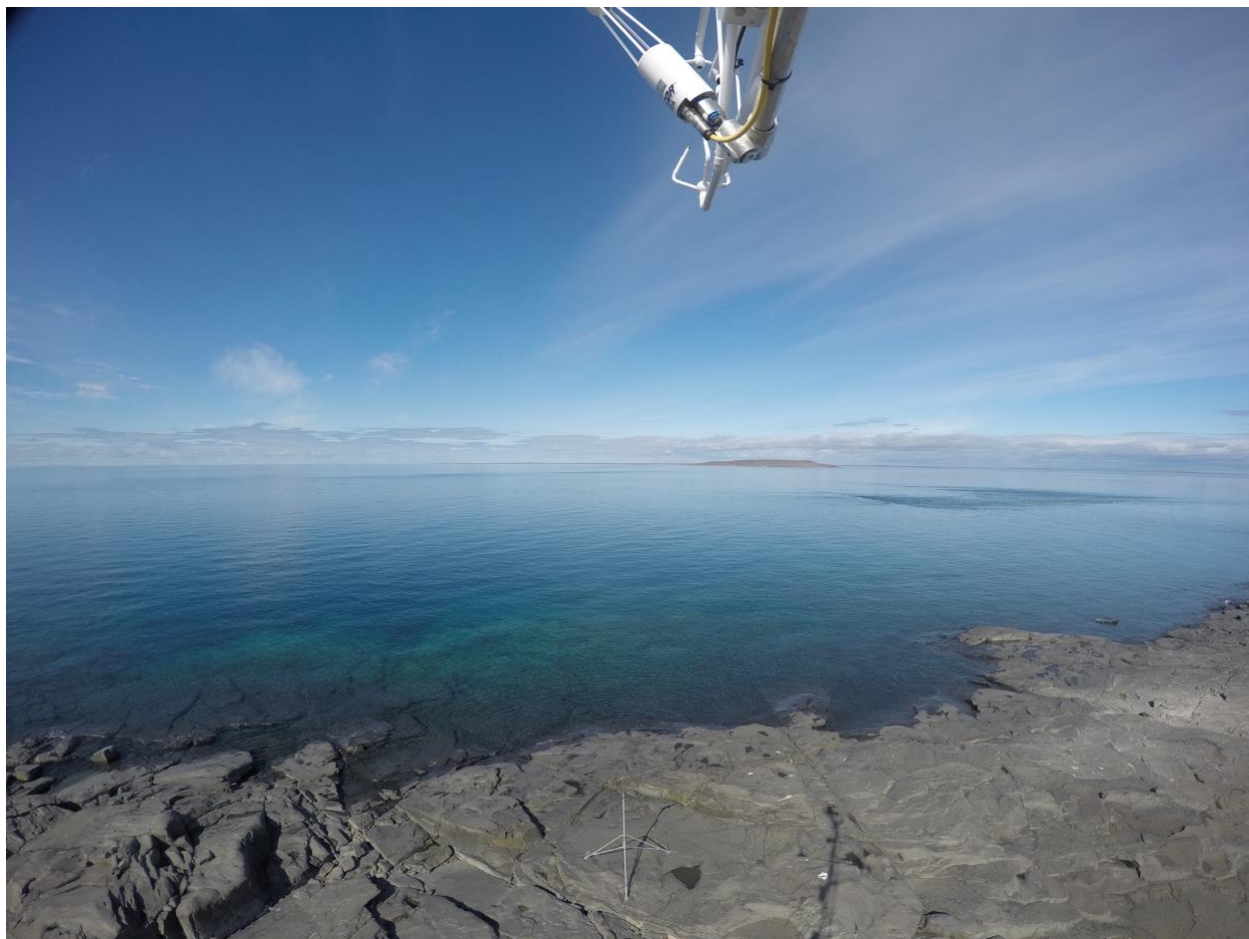

**Figure S6.** GoPro image from the top of the flux tower.
