# Supplementary material for: Dried, closed-path eddy covariance method for measuring carbon dioxide flux over sea ice
Source: Copernicus journal article supplement (doi:10.5194/amt-2018-158), 2018-07-31
Supplement: Supplementary file 2 [file amt-2018-158-supplement.zip]

Archive with 4 entries (4 files):
- supplement/.DS_Store
- supplement/~$images.docx
- supplement/island360.mp4
- supplement/supplement.pdf
